# Supplementary material for: A new analysis of heart rate variability in the assessment of fetal parasympathetic activity: An experimental study in a fetal sheep model
Source: PubMed Central journal article supplement (PMC5503275; doi:10.1371/journal.pone.0180653), 2017-07-10
Supplement: pone.0180653.s001.pdf [file pone.0180653.s001.pdf]

Atropine

| Manip | LF_t1  | HF_t1  | Hfnu_t1    | RMSSD_t1   | FSI_t1     | LF_t2  |
|-------|--------|--------|------------|------------|------------|--------|
| 1     | 16,061 | 45,138 | 0,73756107 | 9,07989231 | 56,6494293 | 18,076 |
| 2     | 22,304 | 77,416 | 0,77633373 | 9,2002169  | 60,4394073 | 13,156 |
| 3     | 15,949 | 75,463 | 0,82552619 | 21,2056727 | 52,3851089 | 13,726 |
| 4     | 31,146 | 64,045 | 0,6728052  | 8,68842459 | 48,1908035 | 41,762 |
| 5     | 11,444 | 24,792 | 0,68418148 | 6,34792845 | 67,165184  | 17,382 |
| 6     | 34,483 | 52,862 | 0,60520923 | 7,41513345 | 61,2293396 | 30,468 |
| 7     | 26,394 | 37,219 | 0,58508481 | 6,33190057 | 57,3366737 | 49,229 |

Propranolol

| Manip | LF_T1  | HF_T1   | HFnu_T1    | RMSSD_T1   | FSI_T1 | LF_T2  |
|-------|--------|---------|------------|------------|--------|--------|
| 1     | 7,467  | 23,75   | 0,76080341 | 3,58887169 | 60     | 11,646 |
| 2     | 32,356 | 63,022  | 0,66076034 | 7,59670981 | 56     | 21,869 |
| 3     | 26,799 | 38,435  | 0,58918662 | 3,39411255 | 50     | 13,823 |
| 4     | 25,405 | 48,524  | 0,65635948 | 22,4273642 | 43     | 7,233  |
| 5     | 29,233 | 56,156  | 0,65764911 | 5,73643327 | 59     | 14,297 |
| 6     | 37,494 | 123,497 | 0,76710499 | 10,5198226 | 57     | 2,153  |

| HF_t2  | Hfnu_t2    | RMSSD_t2   | FSI_t2     |
|--------|------------|------------|------------|
| 21,104 | 0,53864216 | 3,98395475 | 34,4255486 |
| 24,238 | 0,64817885 | 3,04284876 | 35,960331  |
| 32,94  | 0,70586723 | 7,75899068 | 39,1351852 |
| 25,363 | 0,3778473  | 3,45432835 | 46,2421532 |
| 18,993 | 0,52214433 | 2,81208133 | 40,3662949 |
| 39,052 | 0,56173763 | 6,53986184 | 58,048687  |
| 44,455 | 0,47452073 | 6,07817292 | 44,665741  |

| HF_T2  | HFnu_T2    | RSMSD_T2   | FSI_T2 |
|--------|------------|------------|--------|
| 19,048 | 0,62057731 | 3,3901819  | 79     |
| 41,479 | 0,65477995 | 6,3880096  | 55     |
| 45,929 | 0,76866046 | 13,854963  | 67     |
| 19,09  | 0,72522129 | 32,8828223 | 75     |
| 31,688 | 0,68909427 | 4,31       | 39     |
| 13,038 | 0,85827134 | 6,33298245 | 56     |
